# Supplementary material for: Association Between Men’s Exposure to Intimate Partner Violence and Self-reported Health Outcomes in New Zealand
Source: PubMed Central journal article supplement — JAMA Netw Open. 2023 Jan 25;6(1):e2252578. doi: 10.1001/jamanetworkopen.2022.52578 (PMC10187486; doi:10.1001/jamanetworkopen.2022.52578), 2023-01-25
Supplement: jamanetwopen-e2252578-s001.pdf [file jamanetwopen-e2252578-s001.pdf]

## Supplemental Online Content

Mellar BM, Gulliver PJ, Selak V, Hashemi L, McIntosh TKD, Fanslow JL. Association between men's exposure to intimate partner violence and self-reported health outcomes in New Zealand. *JAMA Netw Open*. 2023;6(1):e2252578.  
doi:10.1001/jamanetworkopen.2022.52578

**eTable.** Variable Questions and Definitions From the 2019 New Zealand Family Violence Study Used in Analysis

This supplementary material has been provided by the authors to give readers additional information about their work.

**eTable.** Variable Questions and Definitions From the 2019 New Zealand Family Violence Study Used in Analysis

| Variable                                                                                                                                | Definition            |                                                                                                                                                                                                                                                                                                                                                                                                                                                                                                                                                                                                                                                                                                                                                                                                                                                       |
|-----------------------------------------------------------------------------------------------------------------------------------------|-----------------------|-------------------------------------------------------------------------------------------------------------------------------------------------------------------------------------------------------------------------------------------------------------------------------------------------------------------------------------------------------------------------------------------------------------------------------------------------------------------------------------------------------------------------------------------------------------------------------------------------------------------------------------------------------------------------------------------------------------------------------------------------------------------------------------------------------------------------------------------------------|
| <p><b>IPV exposure</b><br/> <i>Note. All IPV questions were followed by: "If yes, has this happened before the last 12 months?"</i></p> | Physical              | <p>Participants responded "yes" to any (at least one) of the below experiences. Experiences considered severe physical violence are marked with an asterisk.</p> <ul style="list-style-type: none"> <li>• Has any partner ever <b>slapped you or thrown something</b> at you that could hurt you?</li> <li>• Has any partner ever <b>pushed</b> you or <b>shoved</b> you or <b>pulled your hair</b>?</li> <li>• Has any partner ever <b>hit</b> you with <b>their fist</b> or with <b>something else</b> that could hurt you?*</li> <li>• Has any partner ever <b>kicked</b> you, <b>dragged</b> you or <b>beaten</b> you up?*</li> <li>• Has any partner ever <b>choked</b> or <b>burnt</b> you on purpose?*</li> <li>• Has any partner ever <b>threatened</b> to use or actually <b>used a gun, knife, or other weapon</b> against you?*</li> </ul> |
|                                                                                                                                         | Sexual                | <p>Participants responded "yes" to any (at least one) of the below experiences.</p> <ul style="list-style-type: none"> <li>• Did your current partner or any other partner ever <b>force</b> you to have sexual intercourse when you did not want to, for example by <b>threatening</b> you or <b>holding you down</b>?</li> <li>• Did you ever have <b>sexual intercourse you did not want to</b> because you were <b>afraid</b> of what your current or any other partner might do if you refused?</li> <li>• Did your current partner or any other partner ever <b>force</b> you to do anything else sexual that you did not want or that you found <b>degrading</b> or <b>humiliating</b>?</li> </ul>                                                                                                                                             |
|                                                                                                                                         | Psychological         | <p>Participants responded "yes" to one or more of the below experiences.</p> <ul style="list-style-type: none"> <li>• <b>Insulted</b> you or made you feel bad about yourself?</li> <li>• Said or did something that made you feel <b>humiliated</b> in front of other people?</li> <li>• Did things that made you feel <b>scared</b> or <b>intimidated</b>?</li> <li>• <b>Threatened</b> to <b>harm</b> you or <b>someone you care about</b>?</li> <li>• <b>Destroyed things</b> that are important to you?</li> </ul>                                                                                                                                                                                                                                                                                                                               |
|                                                                                                                                         | Controlling behaviors | <p>Participants responded "yes" to one or more of the below experiences.</p> <ul style="list-style-type: none"> <li>• Stopped you from seeing your <b>friends</b>?</li> <li>• Restricted contact with your <b>family</b>?</li> <li>• Insisted on <b>knowing where you are</b> in a way that made you feel <b>controlled</b> or <b>afraid</b>?</li> <li>• Stopped you from getting <b>healthcare</b>?</li> </ul>                                                                                                                                                                                                                                                                                                                                                                                                                                       |

|                        |                                |                                                                                                                                                                                                                                                                                                                                                                                                                                                                                                                                                                                                                                                                                                                                                                                                                                                                                                                                                        |
|------------------------|--------------------------------|--------------------------------------------------------------------------------------------------------------------------------------------------------------------------------------------------------------------------------------------------------------------------------------------------------------------------------------------------------------------------------------------------------------------------------------------------------------------------------------------------------------------------------------------------------------------------------------------------------------------------------------------------------------------------------------------------------------------------------------------------------------------------------------------------------------------------------------------------------------------------------------------------------------------------------------------------------|
|                        | Economic abuse                 | <p>Participants responded “yes” to any (at least one) of the below experiences.</p> <ul style="list-style-type: none"> <li>• Has any partner <b>pressured</b> you into <b>paid work</b> that you did not want to do?</li> <li>• Have you ever <b>given up/refused a job</b> for money because your partner did not want you to work?</li> <li>• Has any partner ever <b>taken your earnings or savings</b> from you against your will?</li> <li>• Has any partner ever <b>refused to give you money</b> for household expenses, even when they have money for other things?</li> <li>• Has any partner ever <b>failed to arrive for or interfered with childcare</b> when you needed to be at work?</li> </ul>                                                                                                                                                                                                                                         |
| <b>Health outcomes</b> | General health                 | <p>Responses to the below question were categorized into a binary variable with good general health including “excellent”/“good” responses or poor general health including “fair”/“poor”/“very poor” responses.</p> <ul style="list-style-type: none"> <li>• In general, would you describe your overall health as excellent, good, fair, poor or very poor?</li> </ul>                                                                                                                                                                                                                                                                                                                                                                                                                                                                                                                                                                               |
|                        | Recent pain or discomfort      | <p>Responses to the below question were categorized into a binary variable with responses scored as 0 (no pain or discomfort) from “no pain at all”/“slight pain or discomfort” responses and 1 (pain or discomfort) including “moderate”/“severe”/“extreme pain or discomfort” responses.</p> <ul style="list-style-type: none"> <li>• In the past four weeks, have you been in pain or discomfort? Would you say no pain at all, slight pain or discomfort, moderate, severe, or extreme pain or discomfort?</li> </ul>                                                                                                                                                                                                                                                                                                                                                                                                                              |
|                        | Recent pain medication use     | <p>A binary variable was created for taking any pain medication in the past four weeks, based on “yes”/“no” responses to the below question.</p> <p>In the past four weeks, have you taken medication to relieve pain?</p>                                                                                                                                                                                                                                                                                                                                                                                                                                                                                                                                                                                                                                                                                                                             |
|                        | Frequent pain medication use   | <p>A binary variable was created based on responses to the below question, which scored responses “None”/“once or twice”/“a few times” as 0 (infrequent) and “many times”/“daily” as 1 (frequent).</p> <ul style="list-style-type: none"> <li>• How often? Once or twice, a few times, many times, or daily?</li> </ul>                                                                                                                                                                                                                                                                                                                                                                                                                                                                                                                                                                                                                                |
|                        | Recent healthcare consultation | <p>A binary variable (“yes”/“no”) was created based on responses to the below question.</p> <ul style="list-style-type: none"> <li>• In the past four weeks, did you consult a doctor or other professional or traditional healthcare worker because you were sick?</li> </ul>                                                                                                                                                                                                                                                                                                                                                                                                                                                                                                                                                                                                                                                                         |
|                        | Diagnosed health conditions    | <p>Due to small numbers for specific health conditions reported in response to the below question, two aggregated binary variables were created for each of “Any physical health condition” (yes/no) and “Any mental health condition” (yes/no). The physical condition binary variable included conditions specified under “Other”, which had been coded by a medical research assistant during the data cleaning process. Hypertension was considered a minor chronic health condition compared with other conditions in the physical health condition variable and thus excluded.</p> <ul style="list-style-type: none"> <li>• Have you ever been told by your doctor that you have any of the following long-term health conditions? Heart disease (including heart attack, angina, or heart failure) cancer, stroke, diabetes (not gestational), asthma, arthritis, depression, anxiety, substance abuse disorder, or other (specify).</li> </ul> |

|                          |               |                                                                                                                                                                                                                                                                                                                                                                          |
|--------------------------|---------------|--------------------------------------------------------------------------------------------------------------------------------------------------------------------------------------------------------------------------------------------------------------------------------------------------------------------------------------------------------------------------|
| <b>Socio-demographic</b> | Food Security | <p>A binary variable was created using the response options of “Never” as 0 (secure) and “Occasionally”/“sometimes”/“often”/“all the time” as 1 (insecure) from responses to the below question.</p> <ul style="list-style-type: none"> <li>Do you ever worry about not having enough money to buy food? Never, occasionally, sometimes, often, all the time.</li> </ul> |
|                          | Education     | <p>A binary variable was created from responses “Primary” or “Secondary or higher” to the below question.</p> <ul style="list-style-type: none"> <li>What is the highest level of education that you achieved? Primary, secondary, higher.</li> </ul>                                                                                                                    |
|                          | Employment    | <p>A categorical variable was created from responses to the below question, as “Not working”, “Housework”, “Student”, “Retired”, or “Employed”.</p> <ul style="list-style-type: none"> <li>What is your main daily occupation? Not working, housework, student, retired, employed.</li> </ul>                                                                            |
