# Supplementary material for: Association Between Men’s Exposure to Intimate Partner Violence and Self-reported Health Outcomes in New Zealand
Source: PubMed Central journal article supplement — JAMA Netw Open. 2023 Jan 25;6(1):e2252578. doi: 10.1001/jamanetworkopen.2022.52578 (PMC10187486; doi:10.1001/jamanetworkopen.2022.52578), 2023-01-25
Supplement: jamanetwopen-e2252578-s002.pdf [file jamanetwopen-e2252578-s002.pdf]

## Data Sharing Statement

Mellar. Association Between Men's Exposure to Intimate Partner Violence and Self-reported Health Outcomes in New Zealand. *JAMA Netw Open*. Published January 25, 2023.  
doi:10.1001/jamanetworkopen.2022.52578

### Data

**Data available:** No
